# Supplementary material
Source: MDPI journal article supplement (https://www.mdpi.com/2227-9717/9/1/67)
Supplement: s1 [file s1]

# Supplementary Materials: Analysis and Optimization of Two Film-Coated Tablet Production Processes by Computer Simulation: A Case Study

Stefanie Hering, Nico Schäuble, Thomas M. Buck, Brigitta Loretz, Thomas Rillmann, Frank Stieneker and Claus-Michael Lehr

**Table S1.** Listing of all integrated process steps with the best fitting statistical distributions according to ExpertFit: It is remarkable that a normal distribution is never the best fitting one. \* Mann–Whitney proved that the historical data of  $P_{INA}$  und  $P_{EMB}$  are not significantly different for these process steps. Therefore, the data of both products were pooled.

| Process step                                   | Statistical distribution $P_{INA}$ | Statistical distribution $P_{EMB}$ |
|------------------------------------------------|------------------------------------|------------------------------------|
| Setup scales (once daily)                      | Empirical table                    | Empirical table                    |
| Weighing granule with a floor scale            | Log-Logistic                       | Pearson type VI                    |
| Weighing granule with a table scale            | Gamma                              | Pearson type VI                    |
| Weighing granulation liquid with a floor scale | Beta*                              | Beta*                              |
| Weighing granulation liquid with a table scale | Log-Logistic*                      | Log-Logistic*                      |
| Dissolution of granulation liquid              | Log-Logistic*                      | Log-Logistic*                      |
| Compulsory mixer (mixing)                      | Weibull                            | Beta                               |
| Fluid bed granulation (incl. mixing steps)     | Log Laplace                        | Beta                               |
| IPC moisture analysis                          | Log Logistic                       | Johnson bounded                    |
| Sieving                                        | Erlang                             | Weibull                            |
| Tumble blender (mixing)                        | Pearson type V*                    | Pearson type V*                    |
| Compaction                                     | Log Laplace                        | Log Logistic                       |
| IPC weighing with a floor scale                | Johnson bounded                    | Pearson type VI                    |
| Weighing coating with a floor scale            | Beta*                              | Beta*                              |
| Weighing coating with a table scale            | Johnson bounded*                   | Johnson bounded*                   |
| Dissolution of coating (dispenser)             | Beta                               | Pearson type VI                    |
| Coating                                        | Log Logistic                       | Beta                               |
| Packaging                                      | Log Logistic                       | Beta                               |

**Table S2.** Listing of additional work steps that are product independent. These times are also included in the models to reflect the capacity utilization of the operators as accurately as possible. As times do not depend on a product, the same fixed times are integrated in all models.

| Process step                           | Duration [min] |
|----------------------------------------|----------------|
| Starting of all systems                | 20             |
| Cleaning of weighing equipment         | 65             |
| Cleaning of other equipment            | 56             |
| Weighing after tumble blending         | 1              |
| Dissolution of coating (Heating plate) | 11             |
| Documentation                          | 15             |
| Compaction (Set up)                    | 51             |
